# Supplementary material
Source: PubMed Central journal article supplement (PMC9605268)
Supplement: mmc1.pdf [file mmc1.pdf]

# THE LANCET

## Infectious Diseases

### Supplementary appendix

This appendix formed part of the original submission and has been peer reviewed.  
We post it as supplied by the authors.

Supplement to: Schwartz NG, Hernandez-Romieu AC, Annambhotla P, et al.  
Nationwide tuberculosis outbreak in the USA linked to a bone graft product:  
an outbreak report. *Lancet Infect Dis* 2022; published online Aug 4. [https://doi.org/10.1016/S1473-3099\(22\)00425-X](https://doi.org/10.1016/S1473-3099(22)00425-X).

## Supplementary appendix

Schwartz NG, Hernandez-Romieu AC, Annambhotla P, et al. Nationwide tuberculosis outbreak in the USA linked to a bone graft product: an outbreak report.

### Contents

|                                                                                                       |    |
|-------------------------------------------------------------------------------------------------------|----|
| Bone Allograft Tuberculosis Investigators .....                                                       | 2  |
| Supplementary methods .....                                                                           | 7  |
| Supplementary tables.....                                                                             | 8  |
| Table S1. Evidence of surgical site tuberculosis disease in bone allograft recipients .....           | 8  |
| Table S2. Evidence of pulmonary tuberculosis disease in bone allograft recipients.....                | 8  |
| Table S3. Evidence of central nervous system tuberculosis disease in bone allograft recipients.....   | 8  |
| Table S4. Evidence of tuberculosis disease at other anatomic sites in bone allograft recipients ..... | 9  |
| Supplementary references.....                                                                         | 10 |

## **Bone Allograft Tuberculosis Investigators**

### **Arizona**

Kristen (Herrick) Brancato — Arizona Department of Health Services, Phoenix  
 Renuka Khurana — Maricopa County Department of Public Health, Phoenix  
 Elizabeth Kim — Arizona Department of Health Services, Phoenix  
 Cherie Stafford — Arizona Department of Health Services, Phoenix  
 Evan M. Timme — Arizona Department of Health Services, Phoenix  
 Lisa R. Villarreal — Arizona Department of Health Services, Phoenix

### **California**

Kristin Edler — County of San Luis Obispo Public Health Department, San Luis Obispo  
 Jennifer M. Flood — California Department of Public Health, Richmond  
 C. Kin Lam — California Department of Public Health, Richmond, and Centers for Disease Control and Prevention  
 Scott A. Nabity — California Department of Public Health, Richmond, and Centers for Disease Control and Prevention  
 Tambi Shaw — California Department of Public Health, Richmond

### **Colorado**

Robert W. Belknap — Public Health Institute at Denver Health, Denver  
 Juli Bettridge — Colorado Department of Public Health and Environment, Denver  
 Caitlin M. Brown — St. Joseph Hospital, Denver  
 Christopher A. Czaja — Colorado Department of Public Health and Environment, Denver  
 Peter B. Dupree — Colorado Department of Public Health and Environment, Denver  
 Michelle Haas — Public Health Institute at Denver Health, Denver  
 Kristen E. Marshall — Colorado Department of Public Health and Environment, Denver, and Centers for Disease Control and Prevention  
 Ann M. Scarpita — Colorado Department of Public Health and Environment, Denver  
 Kelsey E. Star — St. Joseph Hospital, Denver

### **Delaware**

Carol A. Briody — ChristianaCare, Wilmington  
 Marci Drees — ChristianaCare, Wilmington  
 Chad Duffalo — Christiana Hospital, Newark, and Infectious Disease Consultants, Newark  
 Mark Eskander — ChristianaCare, Wilmington, and Delaware Orthopedic Specialists, Wilmington  
 Lija Gireesh — ChristianaCare, Wilmington  
 Emily Hanlin — Delaware Department of Health and Social Services, Division of Public Health, Dover  
 Rick Hong — Delaware Department of Health and Social Services, Division of Public Health, Dover  
 Kenneth Lingenfelter — ChristianaCare, Wilmington, and First State Orthopaedics, Newark  
 Tabé Mase — ChristianaCare, Wilmington  
 Heather Pelkey — ChristianaCare, Wilmington  
 Malika Taylor — Delaware Department of Health and Social Services, Division of Public Health, Dover

### **Florida**

Duane A. Ashe — Florida Department of Health, Tallahassee  
 David Ashkin — Florida Department of Health, Tallahassee  
 Argentina R. Charles — Florida Department of Health, Tallahassee  
 Melanie A. Coleman — Ascension Sacred Heart on the Emerald Coast, Miramar Beach  
 Jalysa N. Erskine — Florida Department of Health, Tallahassee  
 Lori A. Johnston — Florida Department of Health, Tallahassee  
 Christopher Prestel — Florida Department of Health and Centers for Disease Control and Prevention  
 Thomas Privett — Florida Department of Health and Centers for Disease Control and Prevention  
 LaTweika A.T. Salmon — Florida Department of Health, Tallahassee  
 Marcia Yolman — Boca Raton Regional Hospital, Boca Raton

### **Georgia**

Erin L. Anderson — Georgia Department of Public Health, Atlanta  
 Jeanne Negley — Georgia Department of Public Health, Atlanta  
 Susan M. Ray — Georgia Department of Public Health, Atlanta

Benjamin Yarn — Georgia Department of Public Health, Atlanta

### **Illinois**

Catherine A. Counard — Illinois Department of Public Health, Chicago

Elaine Darnall — Illinois Department of Public Health, West Chicago

Shelly Reeter — Illinois Department of Public Health, Springfield

Lisa A. Tossi — Illinois Department of Public Health, Springfield

### **Indiana**

Tamasin Adams — Lutheran Hospital, Fort Wayne

Haley Beeman — Indiana Department of Health, Indianapolis

Amy L. Bennett — St. Joseph Regional Medical Center, Mishawaka

Jill Brock — Indiana Department of Health, Indianapolis

Rachel Cathey — Eskenazi Hospital, Indianapolis

Biak Chinpar — Indiana Department of Health, Indianapolis

Roxane Collins — Indiana Department of Health, Indianapolis

Stephanie Craig — Reid Health, Richmond

Amy Fohl — Fayette County Health Department, Connersville

Lauren Gunderson — St. Joseph County Health Department, South Bend

Diedre Hamilton — Grant County Health Department, Marion

Alicia Hill — Rush County Health Department, Rushville

Carma Jo Johnson — DeKalb County Health Department, Auburn

Mary Kinser — Lawrence County Health Department, Bedford

Christy Kitt — Elkhart County Health Department, Elkhart

Scovia M. Kiwanuka — Indiana Department of Health, Indianapolis

Sarah P. Koch — Marion County Public Health Department, Indianapolis

Debra A. Krafft — DeKalb County Health Department, Auburn

Nikki LaTourrette — Howard County Health Department, Kokomo

Michelle Law — Dupont Hospital, Fort Wayne

Dixie Meyer — Rush County Health Department, Rushville

Sandy Miller — Owen County Health Department, Spencer

Sandra Morse — Indiana Department of Health, Indianapolis

Christina Nolan — LaPorte County Health Department, Michigan City

Erika Pitcher — Allen County Department of Health, Fort Wayne

Carrie Ramey — Greene County Health Department, Bloomfield

Teresa Reed — Kosciusko County Health Department, Warsaw

Catherine Sartino — Indiana University Health Methodist Hospital, Indianapolis

Kimberly Schneider — Reid Health, Richmond

Rhomonda Scifres — Jackson County Health Department, Seymour

Nancy Wagner — Delaware County Health Department, Muncie

Mary Weber — Elkhart County Health Department, Elkhart

Kelly White — Indiana Department of Health, Indianapolis

Jean Young — Indiana University Health Bloomington Hospital, Bloomington

### **Kentucky**

Emily A. Anderson — Kentucky Department for Public Health, Frankfort

Laura L. Collins — Lexington-Fayette County Health Department, Lexington

Andrea Flinchum — Kentucky Department for Public Health, Frankfort

Natalie Hickam — CHI Saint Joseph Health, Lexington

Charles A. Kennedy — CHI Saint Joseph Health, Lexington

Michelle McClure — Saint Joseph Health, Lexington

Natasha Reese — CHI Saint Joseph Health, Lexington

Charles Rhea — Kentucky Department for Public Health, Frankfort

Dana M. Stephens — CHI Saint Joseph Health, Lexington

Michelle Stephens — Kentucky Department for Public Health, Frankfort

### **Louisiana**

John P. Areno — Louisiana Department of Health, Shreveport

Michael Lacassagne — Louisiana Department of Health, New Orleans

Erica J. Washington — Louisiana Department of Health, New Orleans

Jamie Wooley — Louisiana Department of Health, Shreveport  
 Kathryn Yoo — Louisiana Department of Health, New Orleans

### **Maryland**

Nancy G. Baruch — Maryland Department of Health, Baltimore  
 Lisa S. Paulos — Maryland Department of Health, Baltimore  
 Rebecca F. Perlmutter — Maryland Department of Health, Baltimore  
 Jamie H. Rubin — Maryland Department of Health, Baltimore  
 Kelly S. Russo — Anne Arundel County Department of Health, Annapolis  
 Paul G. Saleeb — Maryland Department of Health, Baltimore

### **Michigan**

Brianne Bachman — Beaumont Hospital, Farmington Hills  
 Candice E. Betke — Detroit Public Health — TB Control Program, Detroit  
 Brenda M. Brennan — Michigan Department of Health and Human Services, Lansing  
 Rebecca Campau — St. Clair County Health Department, Port Huron  
 Sarah Carden — Beaumont Hospital, Troy  
 Thomas Chevalier — Henry Ford Health System, Detroit  
 James Collins — Michigan Department of Health and Human Services, Lansing  
 Tammy Cooper — Detroit Public Health — TB Control Program, Detroit  
 Jennifer M. Cordell — Ascension Providence Hospital, Southfield  
 Joseph R. Coyle — Michigan Department of Health and Human Services, Lansing  
 Peter Davidson — Michigan Department of Health and Human Services, Lansing  
 Susan Fletcher-Gutowski  
 Michelle Flood — Ascension St. John Hospital, Detroit  
 Wendy Frizzo — Beaumont Hospital, Troy  
 Karen Gorman — Wayne County Department of Health, Wayne  
 Jacqueline Han — Beaumont Hospital, Troy  
 Dana G. Kissner — Wayne State University Physician Group, Detroit  
 Deedra LaPointe — Beaumont Hospital, Troy  
 Niki Mach — Macomb County Health Department, Mt. Clemens  
 Jennifer A. Madigan — Ascension St. John Hospital, Detroit  
 Nicole M. McGuire — Michigan Department of Health and Human Services, Lansing  
 Annette Mercatante — St. Clair County Health Department, Port Huron  
 Jane E. Rogers — Michigan Department of Health and Human Services, Lansing  
 Jonah P. Sementkowski — Beaumont Health, Trenton  
 Mamta Sharma — Ascension St. John Hospital, Detroit  
 Shona R. Smith — Michigan Department of Health and Human Services, Lansing  
 James C. Sunstrum — Beaumont Health, Dearborn  
 Betty Thompson — Beaumont Health, Trenton  
 Elizabeth Thompson — Beaumont Health, Trenton  
 Denise Wisner — Macomb County Health Department, Mt. Clemens

### **Minnesota**

Sarah Gordon — Minnesota Department of Health, Saint Paul  
 R. Bryan Rock — Hennepin Healthcare, Minneapolis  
 John W. Wilson — Mayo Clinic, Rochester

### **New Jersey**

Alfred A. Lardizabal — Global Tuberculosis Institute at Rutgers New Jersey Medical School, Newark

### **New Mexico**

Marcos Burgos — New Mexico Department of Health, Santa Fe  
 Brenda Montoya Denison — New Mexico Department of Health, Santa Fe

### **North Carolina**

Bill Cleve — Vidant Medical Center, Greenville  
 Savannah Conley — Wake County Public Health Center, Raleigh  
 Paul Cook — Brody School of Medicine at East Carolina University, Greenville  
 Rachael Cope — Iredell County Health Department, Statesville

Leigh C. Cutler — Pitt County Public Health Center, Greenville  
 William A.B. Dalzell — Brody School of Medicine at East Carolina University, Greenville  
 Darlene Farmer — North Carolina Department of Health & Human Services, Raleigh  
 Susan E. Fawcett — Vidant Medical Center, Greenville  
 Lynn Hill — North Carolina Department of Health & Human Services, Raleigh  
 Daniela K. Ingram — North Carolina Department of Health & Human Services, Raleigh  
 Rose R. Kornegay — Duplin County Health Department, Kenansville  
 Sharon Owens — Craven County Health Department, New Bern  
 Keith M. Ramsey — Vidant Medical Center and Brody School of Medicine at East Carolina University  
 Brittany Richo — North Carolina Department of Health & Human Services, Raleigh  
 Jason E. Stout — Duke University Medical Center, Durham  
 Jennifer B. Wheeler — North Carolina Department of Health & Human Services, Raleigh

### **Ohio**

Kim Biery — Miami Valley Hospital Premier Health, Dayton  
 Steven D. Burdette — Miami Valley Hospital Premier Health, Dayton  
 Holly J. Byall — Cleveland Clinic Akron General, Akron  
 Roberto Colon — Miami Valley Hospital Premier Health, Dayton  
 Chasidy Davis — Highland County Health Department, Hillsboro  
 Donald M. Dumford III — Cleveland Clinic Akron General, Akron  
 Christa Easton — Hamilton County Public Health, Cincinnati  
 Rachel Flossie — Summit County Public Health, Akron  
 Emily Hoisington — Darke County General Health District, Greenville  
 April Justice — Ohio Department of Health, Columbus  
 Sarah Mitchell — Ohio Department of Health, Columbus  
 Marika C. Mohr — Ohio Department of Health, Columbus  
 Erin Onder — Western Reserve Hospital, Cuyahoga Falls  
 Dave Orskey — Mayfield Spine Surgery Center, Cincinnati  
 Belinda Reilly — Miami County Public Health, Troy  
 Sara Stokes — Ohio Department of Health, Columbus  
 Julia Toy — Mayfield Spine Surgery Center, Cincinnati  
 Gary Trentman — Ohio Department of Health, Columbus  
 Martha Walter — Hamilton County Public Health, Cincinnati

### **Oregon**

Kiley Ariail — Oregon Public Health Division, Portland  
 Heidi Behm — Oregon Public Health Division, Portland  
 Rebecca Pierce — Oregon Public Health Division, Portland

### **Pennsylvania**

Bureau of Communicable Diseases, Pennsylvania Department of Health

### **South Dakota**

Kristin Rounds — South Dakota Department of Health, Pierre  
 Kipp Stahl — South Dakota Department of Health, Pierre

### **Texas**

Lisa Y. Armitige — Heartland National TB Center, San Antonio  
 Shawna Blasingame — Texas Department of State Health Services, Austin  
 Juanita M. Mathis — Houston Health Department  
 Patrick O. Ndibe — Houston Health Department  
 Charlene Offiong — Houston Health Department  
 Richard Stancil — Houston Health Department  
 David J. Tweardy — MD Anderson Cancer Center, Houston

### **Virginia**

Taniqua Day — Inova Health System, Falls Church  
 Jasie L. Hearn — Virginia Department of Health, Richmond  
 Sarah F. Lineberger — Virginia Department of Health, Richmond  
 Scarlett Murray — Loudoun County Health Department, Leesburg

Michelle Peninger — Inova Health System, Falls Church  
 Tina Poore — Inova Health System, Falls Church  
 Kelley Schultz — Inova Health System, Falls Church  
 Carolyn Simpson — Loudoun County Health Department, Leesburg  
 Laura R. Young — Virginia Department of Health, Richmond

#### **Washington**

Monica L. Czaplá — Clark County Public Health, Vancouver  
 Marisa D'Angeli — Washington State Department of Health, Shoreline  
 Catherine Kroll — PeaceHealth, Vancouver  
 Monica Pecha — Washington State Department of Health, Shoreline  
 Sara Podczervinski — Washington State Department of Health, Shoreline

#### **U.S. Department of Agriculture, Animal and Plant Health Inspection Service, Veterinary Services, National Veterinary Services Laboratories, Ames, Iowa**

Kimberly A. Lehman  
 David J. Schwebs  
 Tyler C. Thacker

#### **U.S. Food and Drug Administration, Center for Biologics Evaluation and Research, Office of Tissues and Advanced Therapies, Division of Human Tissues, Silver Spring, Maryland**

Scott A. Brubaker  
 Brychan Clark

#### **U.S. Centers for Disease Control and Prevention, Atlanta, Georgia**

Leeanna E. Allen — Division of Tuberculosis Elimination  
 Sandy P. Althomsons — Division of Tuberculosis Elimination  
 Pallavi Annambhotla — Division of Healthcare Quality Promotion  
 Sapna Bamrah Morris — Division of Tuberculosis Elimination  
 Sridhar V. Basavaraju — Division of Healthcare Quality Promotion  
 Isaac Benowitz — Division of Healthcare Quality Promotion  
 Bruce Bradley — Division of Tuberculosis Elimination  
 Lauren S. Cowan — Division of Tuberculosis Elimination  
 Tracina Cropper — Division of Tuberculosis Elimination  
 Molly Deutsch-Feldman — Division of Tuberculosis Elimination and Epidemic Intelligence Service  
 Thomas D. Filardo — Division of Tuberculosis Elimination and Epidemic Intelligence Service  
 Rebecca J. Free — Division of Healthcare Quality Promotion  
 Janet Burton Glowicz — Division of Healthcare Quality Promotion  
 Maryam B. Haddad — Division of Tuberculosis Elimination  
 Alfonso C. Hernandez-Romieu — Division of Healthcare Quality Promotion and Epidemic Intelligence Service  
 Bonnie Herring — Division of Healthcare Quality Promotion  
 Adam J. Langer — Division of Tuberculosis Elimination  
 Ruoran Li — Division of Healthcare Quality Promotion and Epidemic Intelligence Service  
 Philip LoBue — Division of Tuberculosis Elimination  
 Angelica Martinez — Division of Tuberculosis Elimination  
 Clinton J. McDaniel — Division of Tuberculosis Elimination  
 Kalandra McDaniel — Division of Tuberculosis Elimination  
 Robert H. Pratt — Division of Tuberculosis Elimination  
 Shanica Railey — Division of Tuberculosis Elimination  
 Kala M. Raz — Division of Tuberculosis Elimination  
 Noah G. Schwartz — Division of Tuberculosis Elimination and Epidemic Intelligence Service  
 Angela M. Starks — Division of Tuberculosis Elimination  
 Rebekah J. Stewart — Division of Tuberculosis Elimination  
 Sarah Talarico — Division of Tuberculosis Elimination  
 W. Wyatt Wilson — Division of Healthcare Quality Promotion and Epidemic Intelligence Service  
 Jonathan M. Wortham — Division of Tuberculosis Elimination

## Supplementary methods

### *Real-time polymerase chain reaction (rt-PCR) and culture*

Approximately 100 mg of the bone allograft material was transferred to a screw-top tube containing 400  $\mu$ L 1x TE with 100  $\mu$ L 1.0 mm and 200  $\mu$ L 0.1 mm glass beads along with an extraction control. The sample was heat inactivated and then homogenized using a BioSpec Beadbeater as recommended by the manufacturer. Deoxyribonucleic acid (DNA) was isolated, and the presence of the *M. tuberculosis* complex DNA was detected using a real-time polymerase chain reaction (PCR) assay that amplifies the *IS1081* and *IS6110* insertion elements. The remaining material was homogenized in 7 mL sterile phosphate-buffered saline (PBS) using a gentleMacs Tissue Homogenizer. The soluble portions of the samples were centrifuged to pellet any potential mycobacteria in the sample. The supernatant was decanted, and the pellet resuspended in 3 mL sterile PBS. 400  $\mu$ L was used to inoculate BD BACTEC Mycobacterial Growth Indicator Tube (MGIT) media in duplicate. 1.5 mL of 800  $\mu$ g/mL erythromycin was added to the MGIT PANTA dry mix supplied in the BACTEC MGIT Supplement Kit. Then 15 mL of the reconstituting fluid was added to the PANTA/erythromycin mix. 0.8 mL of the reconstituted PANTA/erythromycin mix was added to each MGIT tube. Using a swab, commercially available solid media (Stonebrinks, Lowenstein-Jensen, and Mycobactosol-Lowenstein-Jensen) and in-house prepared solid media (7H11 with pyruvate and 7H11 with glycerol) were inoculated.

### *Whole-genome sequencing and phylogenetic analysis*

Nextera XT sequencing libraries were sequenced (2 x 150 bp reads) on the NextSeq 500 platform using NextSeq 500/550 Mid Output Kit v2.5 300 cycle chemistry. Samples with a sequence read set Q30 frequency <85% were re-sequenced. Reference-guided assemblies were created using BioNumerics 7.6 Reference Mapper v 1.2.3 using *M. tuberculosis* strain H37Rv (NC00962.3) as the reference with the following settings for base calling: minimum total coverage=3, minimum forward coverage=1, minimum reverse coverage=1, single base threshold=0.75, double base threshold=0.85, triple base threshold=0.95, gap threshold=0.5. A bowtie-based algorithm was used.<sup>1</sup> Samples with an average genome coverage <25 were re-sequenced. Reference-guided assembly samples were compared using BioNumerics 7.6 single nucleotide polymorphism (SNP) analysis filters. For a SNP to be retained in the comparison, the base in all samples must have had a total coverage of 5 reads, must not have contained ambiguous bases, must not have contained unreliable bases, must not have contained gaps, and must not have been within 12 base-pairs of another SNP. SNPs that were non-informative (identical in all samples) were also excluded. The comparison was visualized using a phylogenetic tree constructed using the neighbor-joining method. *M. tuberculosis* strain H37Rv was used as the outgroup and the phylogenetic tree was rooted at the midpoint of the longest branch.

### *Molecular Detection of Drug Resistance (MDDR)*

CDC's National Tuberculosis Reference Laboratory performed Sanger DNA sequencing to assess an *M. tuberculosis* isolate from unused bone allograft material for genetic mutations associated with resistance to rifampin, isoniazid, ethambutol, pyrazinamide, fluoroquinolones, kanamycin, capreomycin, and amikacin. Loci were sequenced in the following genes: *rpoB* (associated with rifampin resistance); *inhA*, *katG*, and *fabG1* (associated with isoniazid resistance); *embB* (associated with ethambutol resistance); *pncA* (associated with pyrazinamide resistance); *gyrA* and *gyrB* (associated with fluoroquinolone resistance); *rrs* (associated with resistance to kanamycin, amikacin, and capreomycin), *tlyA* (associated with capreomycin resistance), and *eis* (associated with kanamycin resistance). Detailed methods and performance characteristics are described in a previously published, publicly available guide.<sup>2</sup>

### *Growth-based drug susceptibility testing*

CDC's National Tuberculosis Reference Laboratory used an indirect agar proportion method (Middlebrook 7H10 agar) to test an *M. tuberculosis* isolate from unused bone allograft material for susceptibility to 12 drugs: isoniazid, rifampin, ethambutol, ciprofloxacin, ofloxacin, streptomycin, kanamycin, capreomycin, amikacin, rifabutin, ethionamide, and para-aminosalicylic acid. Resistance was defined as >1% growth on drug-containing medium compared to drug-free medium. Pyrazinamide susceptibility was tested using the BD BACTEC MGIT 960 system.



## Supplementary tables

**Table S1. Evidence of surgical site tuberculosis disease in bone allograft recipients**

|                                                                          | No. | No. with available data | Percentage of all 113 recipients | Percentage of recipients with available data |
|--------------------------------------------------------------------------|-----|-------------------------|----------------------------------|----------------------------------------------|
| <b>Microbiologic or imaging evidence</b>                                 | 83  | 106                     | 73%                              | 78%                                          |
| <b>Microbiologic evidence</b>                                            | 54  | 63                      | 48%                              | 86%                                          |
| Positive AFB smear                                                       | 40  | 61                      | 35%                              | 66%                                          |
| Positive NAAT                                                            | 31  | 44                      | 27%                              | 70%                                          |
| Positive culture                                                         | 51  | 58                      | 45%                              | 88%                                          |
| <b>Imaging evidence</b>                                                  | 80  | 106                     | 71%                              | 75%                                          |
| Abscess or fluid collection                                              | 69  | 106                     | 61%                              | 65%                                          |
| Osteomyelitis                                                            | 36  | 106                     | 32%                              | 34%                                          |
| Discitis                                                                 | 18  | 106                     | 16%                              | 17%                                          |
| Meningeal enhancement (without clinical signs or symptoms of meningitis) | 2   | 106                     | 2%                               | 2%                                           |
| Other abnormality compatible with tuberculosis                           | 3   | 106                     | 3%                               | 3%                                           |

AFB=acid-fast bacilli. NAAT=nucleic acid amplification test.

**Table S2. Evidence of pulmonary tuberculosis disease in bone allograft recipients**

|                                          | No. | No. with available data | Percentage of all 113 recipients | Percentage of recipients with available data |
|------------------------------------------|-----|-------------------------|----------------------------------|----------------------------------------------|
| <b>Microbiologic or imaging evidence</b> | 27  | 110                     | 24%                              | 25%                                          |
| <b>Microbiologic evidence</b>            | 13  | 58                      | 12%                              | 22%                                          |
| Positive AFB smear                       | 4   | 58                      | 4%                               | 7%                                           |
| Positive NAAT                            | 11  | 51                      | 10%                              | 22%                                          |
| Positive culture                         | 11  | 56                      | 10%                              | 20%                                          |
| <b>Imaging evidence</b>                  | 23  | 110                     | 20%                              | 21%                                          |
| Miliary lesions                          | 13  | 110                     | 12%                              | 12%                                          |
| Multifocal nodular lesions               | 19  | 110                     | 17%                              | 17%                                          |
| Cavitary lesions                         | 3   | 110                     | 3%                               | 3%                                           |

AFB=acid-fast bacilli. NAAT=nucleic acid amplification test.

**Table S3. Evidence of central nervous system tuberculosis disease in bone allograft recipients**

|                                                                                                   | No. | No. with available data | Percentage of all 113 recipients | Percentage of recipients with available data |
|---------------------------------------------------------------------------------------------------|-----|-------------------------|----------------------------------|----------------------------------------------|
| <b>Microbiologic or imaging evidence</b>                                                          | 3*  | 10                      | 3%                               | 30%                                          |
| <b>Microbiologic evidence</b>                                                                     | 1   | 5                       | 1%                               | 20%                                          |
| Positive AFB smear                                                                                | 0   | 5                       | 0%                               | 0%                                           |
| Positive NAAT                                                                                     | 1   | 3                       | 1%                               | 33%                                          |
| Positive culture                                                                                  | 1   | 3                       | 1%                               | 33%                                          |
| <b>Imaging evidence</b>                                                                           | 3   | 8                       | 3%                               | 38%                                          |
| Brain tuberculomas                                                                                | 2   | 8                       | 2%                               | 25%                                          |
| Leptomeningeal enhancement of the cervical spine (with clinical signs and symptoms of meningitis) | 1   | 8                       | 1%                               | 13%                                          |

AFB=acid-fast bacilli. NAAT=nucleic acid amplification test.

\* One additional patient had clinically diagnosed tuberculous meningitis based on cerebrospinal fluid cell counts and chemistries.

**Table S4. Evidence of tuberculosis disease at other anatomic sites in bone allograft recipients**

|                                          | No. | No. with available data* | Percentage of all 113 recipients | Percentage of recipients with available data* |
|------------------------------------------|-----|--------------------------|----------------------------------|-----------------------------------------------|
| Positive blood culture                   | 3   | 5                        | 3%                               | --                                            |
| Positive culture of liver specimen       | 1   | 2                        | 1%                               | --                                            |
| Positive culture of bone marrow specimen | 1   | 2                        | 1%                               | --                                            |

\*For the anatomic sites in this table, negative test results were not systematically reported so percentages among recipients with available data were not calculated.

**Supplementary references**

1. Pouseele H, Supply P. Accurate whole-genome sequencing-based epidemiological surveillance of *Mycobacterium tuberculosis*. In: Sails A, Tang Y-W, ed. *Methods in Microbiology*, Vol 42. Cambridge, MA: Academic Press, 2015: 359-394. <https://doi.org/10.1016/bs.mim.2015.04.001>
2. Centers for Disease Control and Prevention. Laboratory user guide for U.S. public health laboratories: Molecular Detection of Drug Resistance (MDDR) in *Mycobacterium tuberculosis* complex by DNA sequencing (version 2.0). <https://www.cdc.gov/tb/topic/laboratory/mddrusersguide.pdf> (accessed October 1, 2021).
